# Supplementary material
Source: PubMed Central journal article supplement (PMC420416)

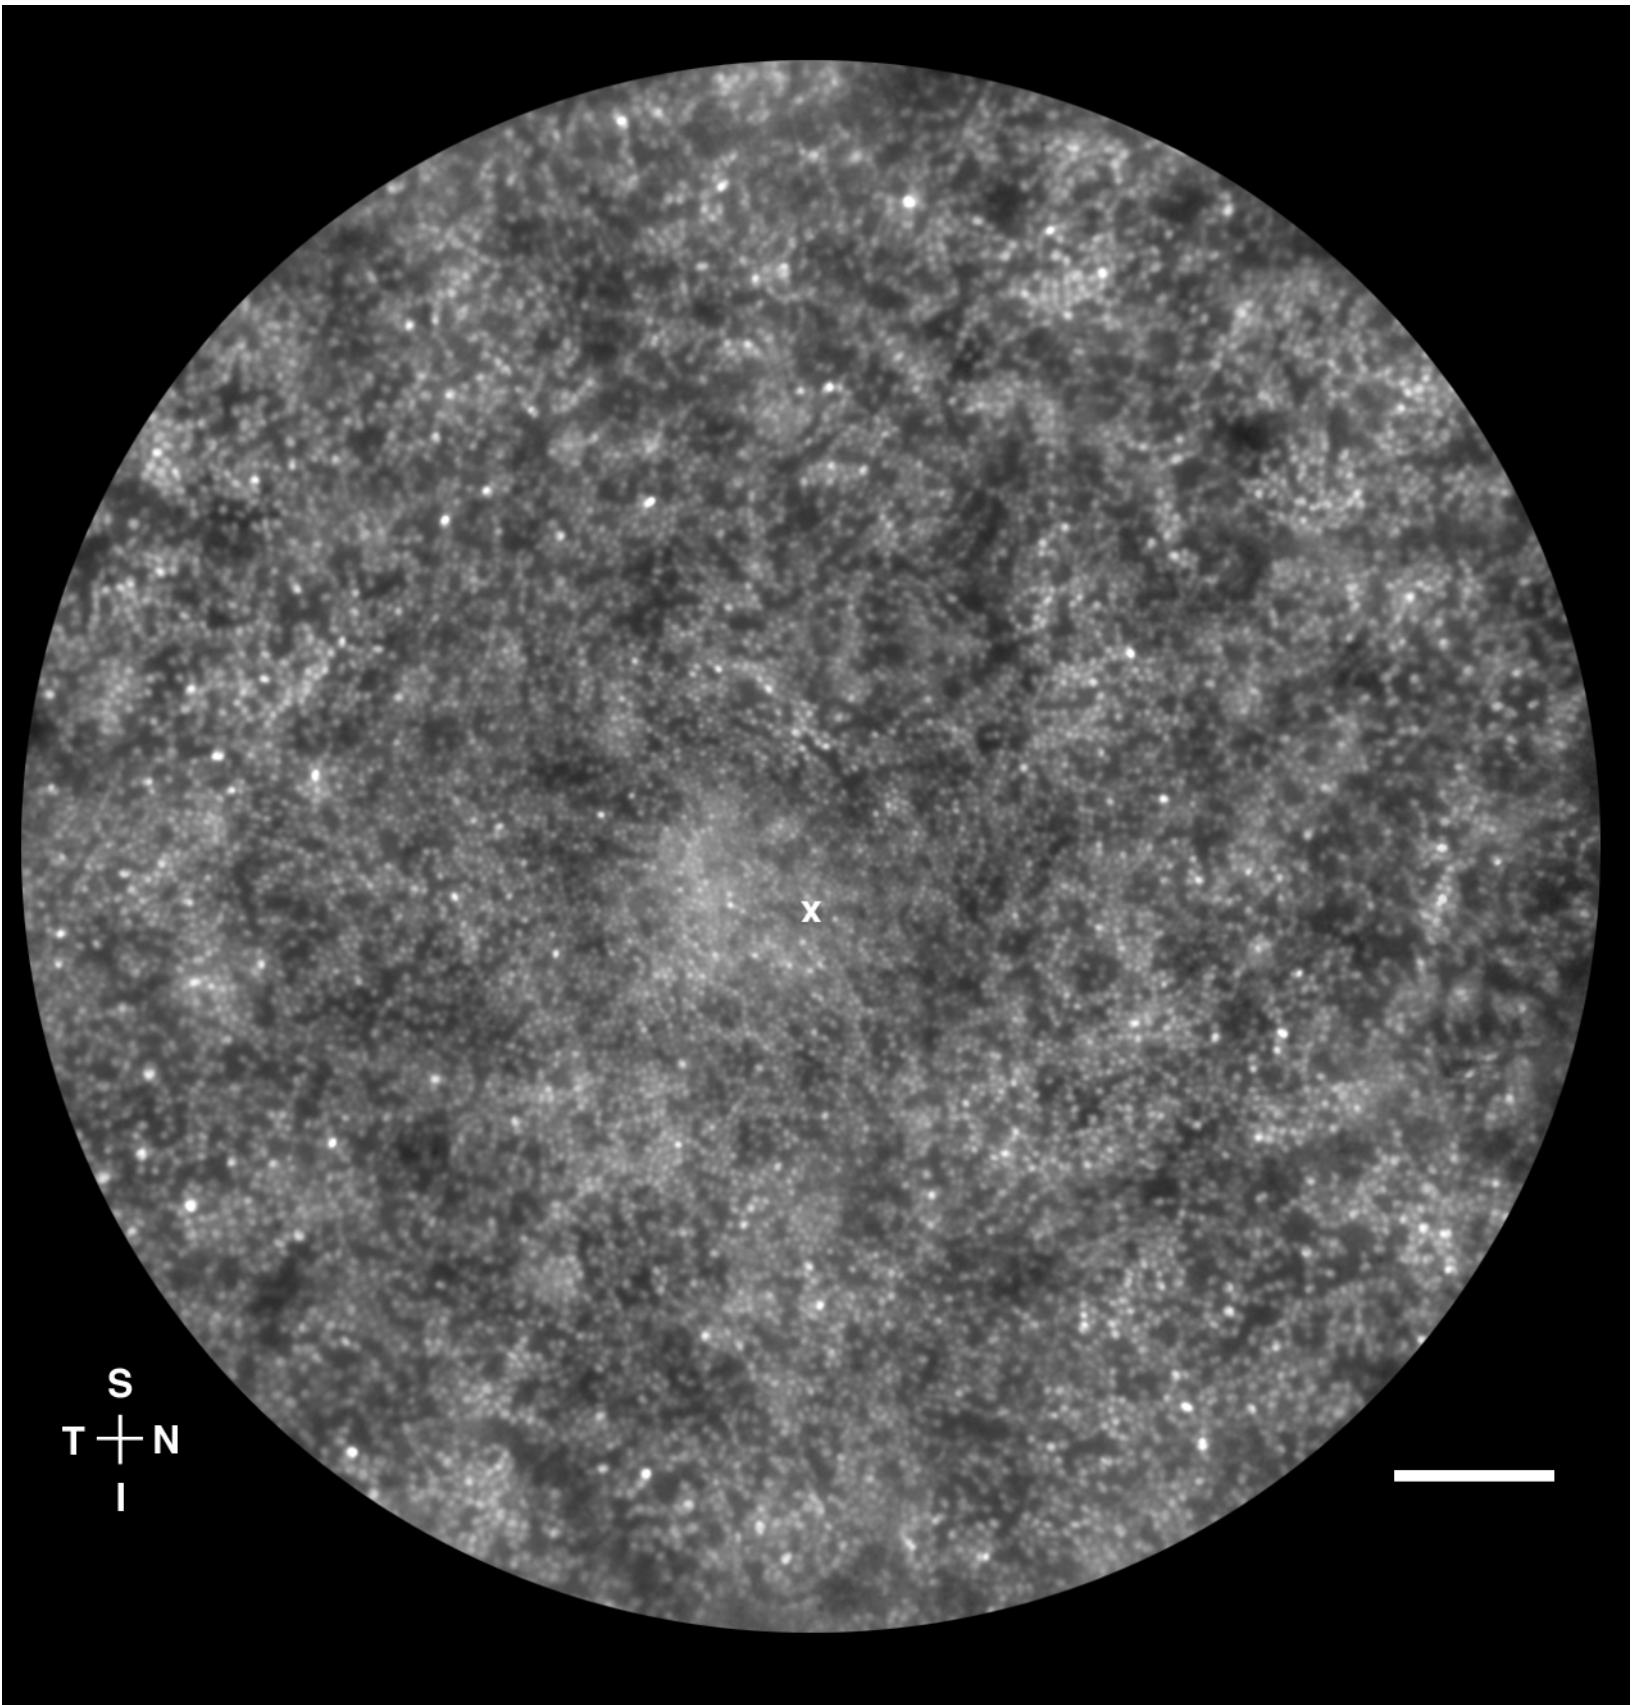

x

S  
T + N  
I

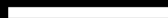

Supplement: pnas_101_22_8461__1.pdf [file pnas_101_22_8461__1.pdf]
